# Supplementary material
Source: PubMed Central journal article supplement (PMC4315425)
Supplement: jp508471v_si_001.pdf [file jp508471v_si_001.pdf]

## Supporting Information

### Hydrogen Sulfide Inhibits Amyloid Formation

Manuel F. Rosario-Alomar,<sup>§\*</sup> Tatiana Quiñones-Ruiz,<sup>†‡</sup> Dmitry Kurouski,<sup>†</sup> Valentin Sereda,<sup>†</sup> Eduardo B. Ferreira,<sup>†</sup> Lorraine De Jesús-Kim,<sup>‡</sup> Samuel Hernández-Rivera,<sup>§</sup> Dmitri V. Zagorevski,<sup>‡</sup> Juan López-Garriga,<sup>§\*</sup> and Igor K. Lednev<sup>†\*</sup>

<sup>§</sup> Department of Chemistry, University of Puerto Rico at Mayaguez, Mayaguez, Puerto Rico 00693

<sup>†</sup> Department of Chemistry, University at Albany, SUNY, Albany NY 12222

<sup>‡</sup> Center for Biotechnology and Interdisciplinary Studies, Rensselaer Polytechnic Institute, Troy NY 12180

<sup>‡</sup> Department of Biology, University of Puerto Rico at Mayagüez, Mayagüez, Puerto Rico 00680

### Materials and methods

#### Non-resonance Raman experiments

We observed a Raman signature of persulphide (RSSH) and confirmed that RSH does not form in Cysteine solution in the presence of H<sub>2</sub>S. Cysteine was incubated in pH 7.5 PBS buffer in the presence of H<sub>2</sub>S at room temperature for 90 minutes. The solution contained 50 mM cysteine, 250 mM H<sub>2</sub>S that corresponded to the molar ratio of 1:5 (Cys:H<sub>2</sub>S). Powder samples for non-resonance Raman spectroscopic measurements were prepared by drying the corresponding solutions under a nitrogen flow at room temperature. The vast majority of solvent evaporated during this procedure. Raman spectra (785-nm excitation) of HEWL powder samples and cysteine were recorded using a Renishaw inVia confocal Raman spectrograph equipped with a research grade Leica microscope and 50x objective (numerical aperture 0.55). Five accumulations of 30 s each were collected for each sample in the range of 400-1800 cm<sup>-1</sup>. Wire 4.0 software was used for data collection. A laser power of approximately 12 mW was used to avoid sample photo-degradation.

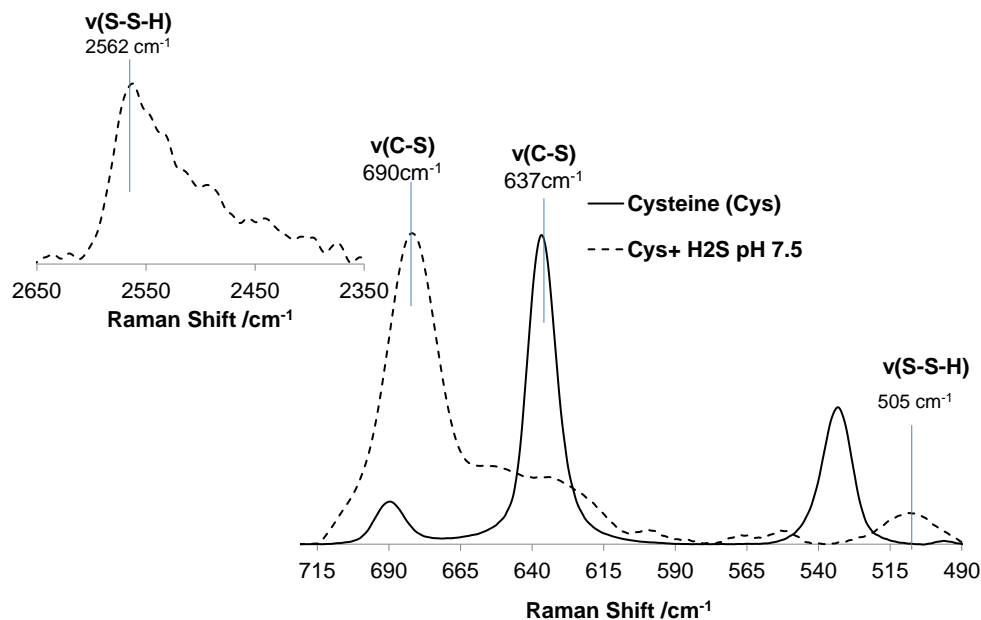

**Figure S1.** Non-resonance Raman spectra of pure cysteine (solid line) and that in presence of H<sub>2</sub>S at pH 7.5 (dotted line). Insert: Raman spectrum of Cysteine in the presence of H<sub>2</sub>S (cysteine persulfide).

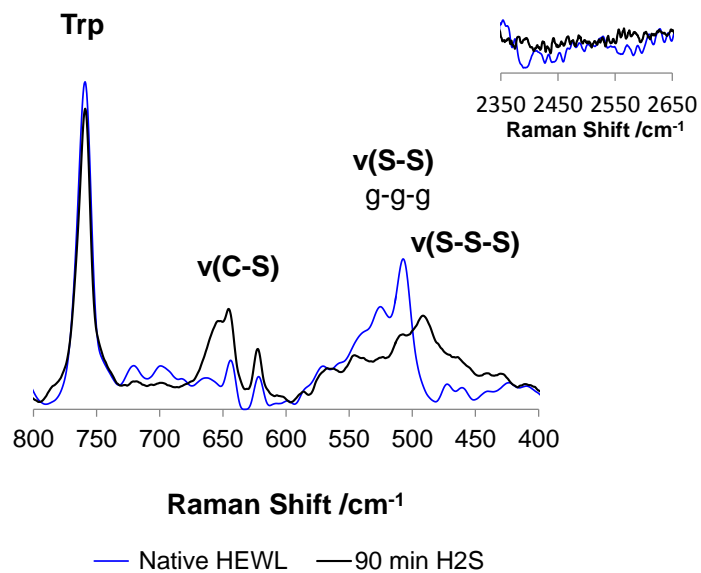

**Figure S2.** Non-resonance Raman spectra of native HEWL (blue line) and HEWL incubated with H<sub>2</sub>S at pH 2 and 60 °C for 90 minutes (black line). Insert: Raman peak corresponding to SH vibration is not evident in the spectra of native HEWL and HEWL incubated with H<sub>2</sub>S.
